# Supplementary material
Source: MDPI journal article supplement (https://www.mdpi.com/2073-4344/13/11/1419)

## Supplementary Materials

### Propane dehydrogenation over cobalt aluminates: Evaluation of potential catalytic active sites

A.N. Chernov, S.V. Cherepanova, E.Yu. Gerasimov, I.P. Prosvirin, G.A. Zenkovets, A.A. Shutilov, K.Yu. Koltunov\* and V.I. Sobolev\*

\**koltunov@catalysis.ru*; \**visobo@catalysis.ru*

#### Table of contents

|                                                                                                                                                                   |        |
|-------------------------------------------------------------------------------------------------------------------------------------------------------------------|--------|
| <b>Table S1.</b> Grid parameters (a), average crystallite sizes and weight ratios.....                                                                            | S2     |
| <b>Figure S1.</b> Propane conversion and selectivity to propylene over CoAl and Co/Al <sub>2</sub> O <sub>3</sub> catalysts .....                                 | S2     |
| <b>Figure S2.</b> Propane conversion and selectivity to propylene over Co/Al <sub>2</sub> O <sub>3</sub> and Co/Al <sub>2</sub> O <sub>3</sub> -R catalysts ..... | S2     |
| <b>Figure S3.</b> Low and higher magnification TEM images of the spent-regenerated CoAl-0.25-R catalyst .....                                                     | S3     |
| <b>Figure S4.</b> HAADF-STEM and related EDX-STEM Co and Al elemental mapping images of different areas of CoAl-0.25-R .....                                      | S4     |
| <b>Table S2.</b> High resolution XPS spectra of Al 2p and O 1s of the samples .....                                                                               | S5     |
| <b>Table S3.</b> The N <sub>2</sub> adsorption/desorption isotherms and the pore size distribution of the samples.....                                            | S7-S11 |

**Table S1.** Grid parameters (a), average crystallite sizes and weight ratios.\*

| Catalyst                          | Average (a), Å | Co <sub>3</sub> O <sub>4</sub> (a), Å | γ-Al <sub>2</sub> O <sub>3</sub> (a), Å | Co <sub>3</sub> O <sub>4</sub> D, nm | γ-Al <sub>2</sub> O <sub>3</sub> D, nm | Co <sub>3</sub> O <sub>4</sub> wt. % | γ-Al <sub>2</sub> O <sub>3</sub> wt. % |
|-----------------------------------|----------------|---------------------------------------|-----------------------------------------|--------------------------------------|----------------------------------------|--------------------------------------|----------------------------------------|
| CoAl-0.5                          | 8.08(1)        | 8.08(1)                               | 7.94(1)                                 | 10                                   | 11                                     | 54                                   | 46                                     |
| CoAl-0.25                         | -              | 8.08(1)                               | 7.95(1)                                 | 7                                    | 6                                      | 21                                   | 79                                     |
| CoAl-0.25-R                       | -              | 8.08(1)                               | 7.96(1)                                 | 9                                    | 7                                      | 29                                   | 71                                     |
| CoAl-0.1                          | 7.99(1)        | 8.08(1)                               | 7.95(1)                                 | 5                                    | 5                                      | 11                                   | 89                                     |
| CoAl-0.1-R                        | 7.97(1)        | 8.08(1)                               | 7.95(1)                                 | 5                                    | 6                                      | 5                                    | 95                                     |
| CoAl-0.05                         | 7.96(1)        | 8.08(1)                               | 7.94(1)                                 | 5                                    | 5                                      | 9                                    | 91                                     |
| Co/Al <sub>2</sub> O <sub>3</sub> | -              | 8.08(1)                               | 7.92(1)                                 | 5                                    | 7                                      | 13                                   | 87                                     |

\* The average lattice parameter (a) was defined for those samples where the Co<sub>3</sub>O<sub>4</sub> peak and the γ-Al<sub>2</sub>O<sub>3</sub> peak overlapped to form one more or less symmetric peak. The grid parameter (a) for Co<sub>3</sub>O<sub>4</sub> can only be determined for CoAl-0.5, for the other catalysts it was fixed at this value.

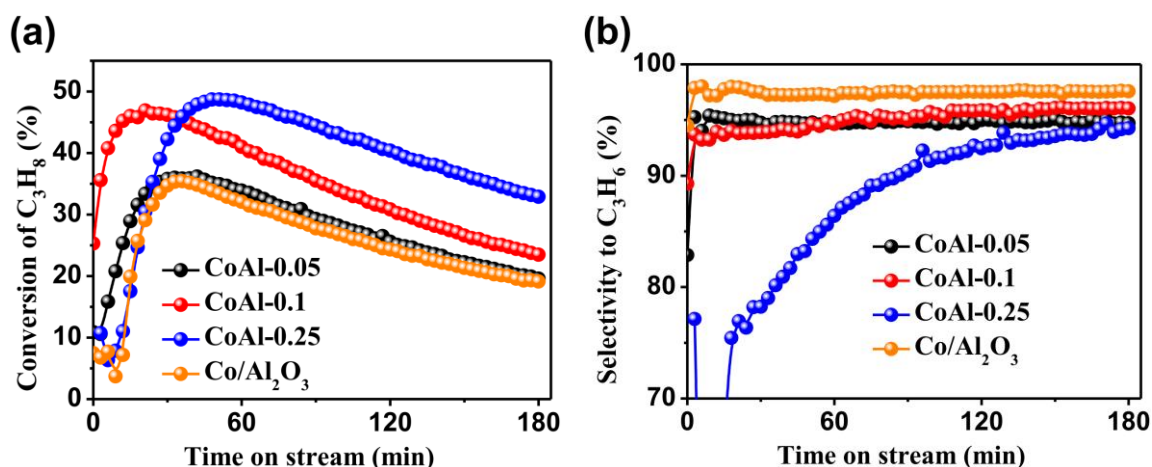

**Figure S1.** Propane conversion (a) and selectivity to propylene (b) as functions of time on stream over CoAl and Co/Al<sub>2</sub>O<sub>3</sub> catalysts at  $T = 600$  °C and  $P = 1$  atm. Gas mixture: 10 vol.% propane, N<sub>2</sub> balance; GHSV = 7500 ml h<sup>-1</sup> g<sub>cat</sub><sup>-1</sup>.

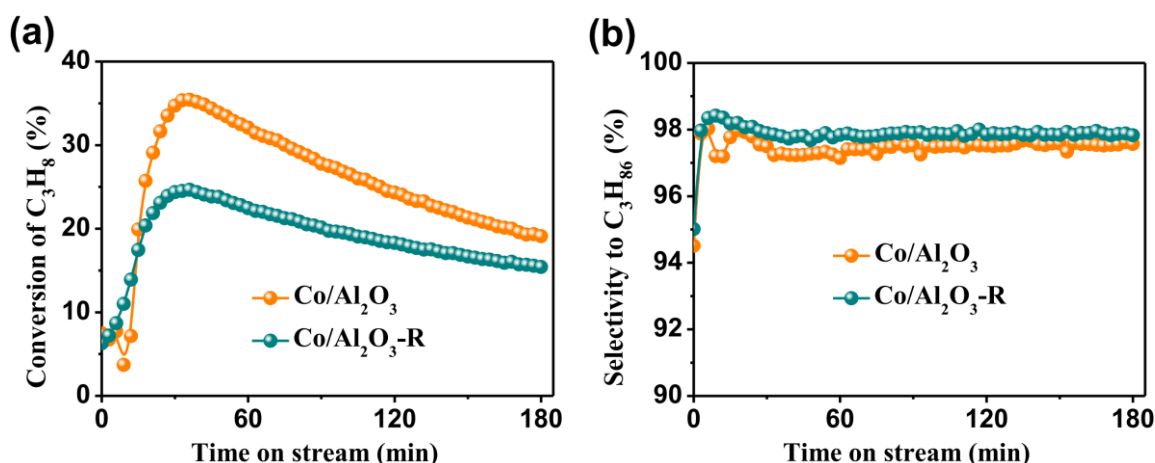

**Figure S2.** Propane conversion (a) and selectivity to propylene (b) as functions of time on stream over Co/Al<sub>2</sub>O<sub>3</sub> and Co/Al<sub>2</sub>O<sub>3</sub>-R catalysts at  $T = 600$  °C and  $P = 1$  atm. Gas mixture: 10 vol.% propane, N<sub>2</sub> balance; GHSV = 7500 ml h<sup>-1</sup> g<sub>cat</sub><sup>-1</sup>.

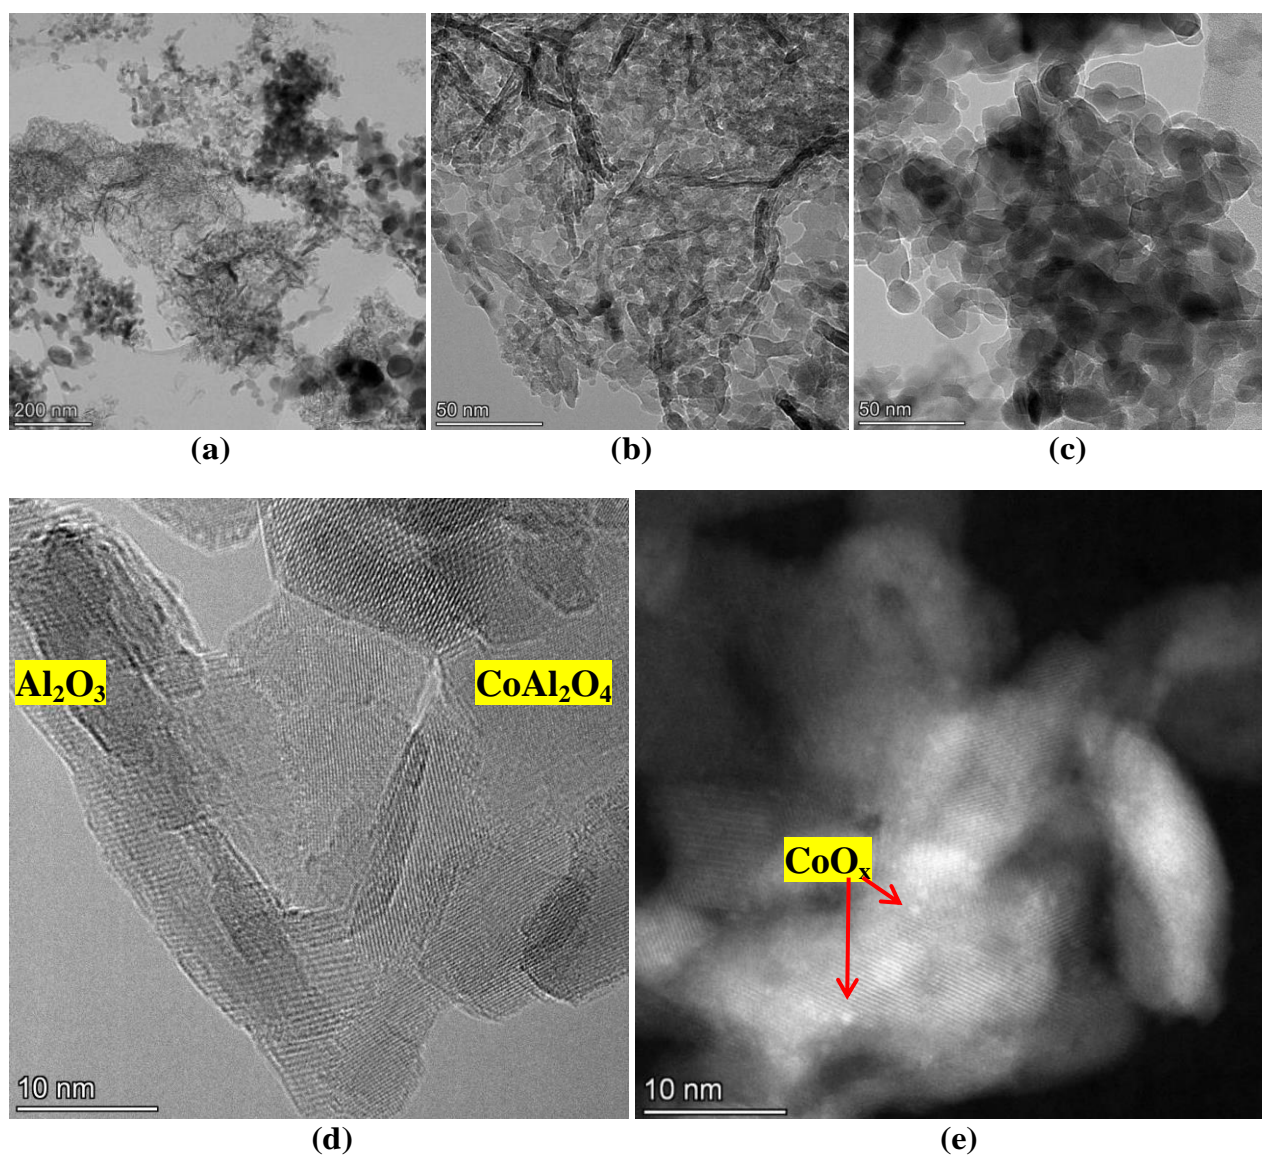

**Figure S3.** Low (a) and higher (b–d) magnification TEM images of the spent-regenerated CoAl-0.25-R catalyst, confirming significant differentiation in its morphology, namely the presence of separate phases of crystalline alumina, cobalt aluminate and cobalt oxides. (e) HAADF-STEM image of  $\text{Al}_2\text{O}_3$  area in CoAl-0.25-R, showing  $\text{CoO}_x$  particles embedded on its surface.



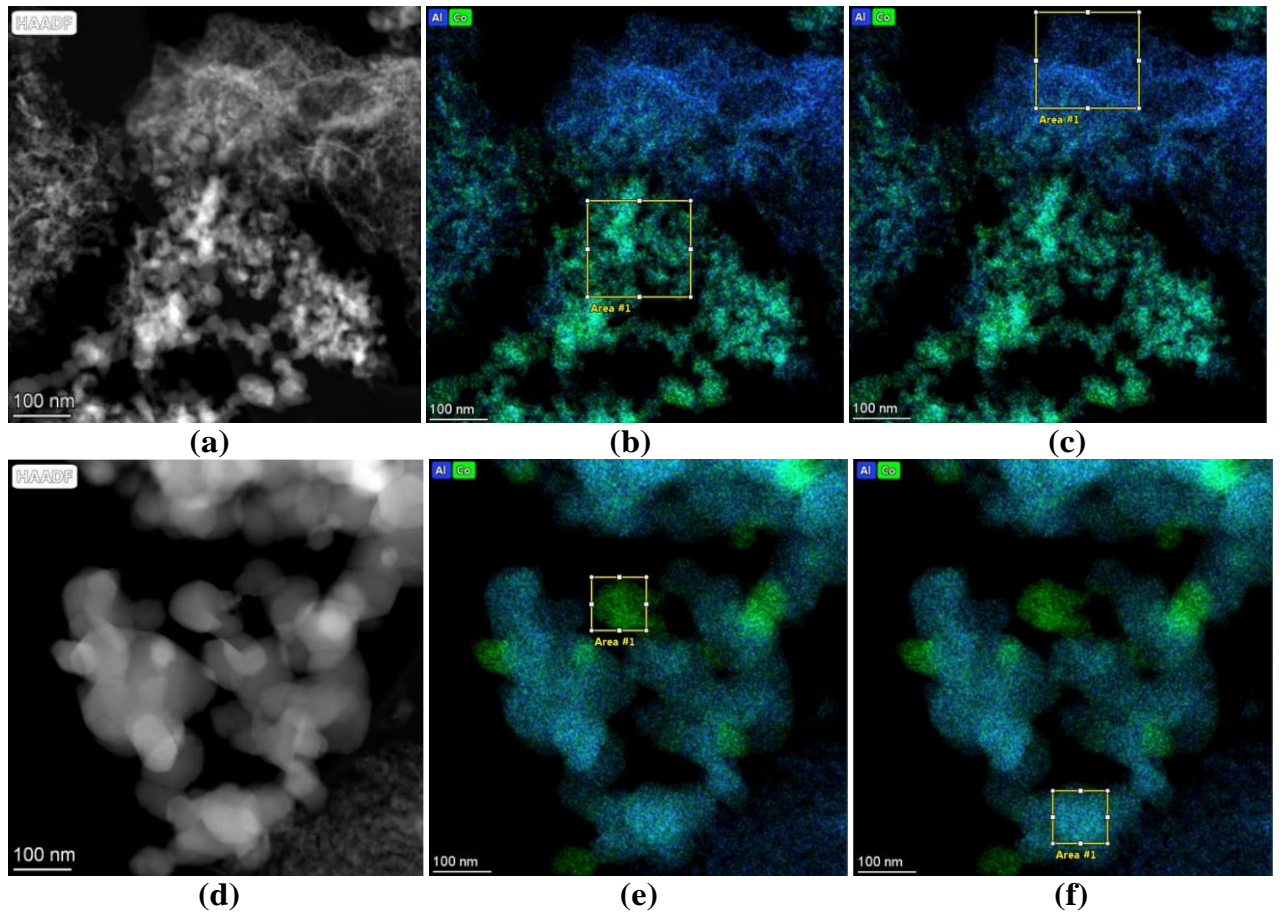

**Table 1. Analysis of spectrum from Area #1 in (b).**

| Z  | Element | Family | Atomic Fraction (%) | Atomic Error (%) | Mass Fraction (%) | Mass Error (%) | Fit error (%) |
|----|---------|--------|---------------------|------------------|-------------------|----------------|---------------|
| 8  | O       | K      | 61.95               | 6.96             | 41.21             | 2.88           | 0.16          |
| 13 | Al      | K      | 25.93               | 5.89             | 29.09             | 6.09           | 0.15          |
| 27 | Co      | K      | 12.12               | 2.11             | 29.69             | 4.47           | 0.19          |

**Table 2. Analysis of spectrum from Area #1 in (c).**

| Z  | Element | Family | Atomic Fraction (%) | Atomic Error (%) | Mass Fraction (%) | Mass Error (%) | Fit error (%) |
|----|---------|--------|---------------------|------------------|-------------------|----------------|---------------|
| 8  | O       | K      | 59.57               | 8.72             | 43.80             | 3.95           | 0.35          |
| 13 | Al      | K      | 36.30               | 8.92             | 45.02             | 9.77           | 0.09          |
| 27 | Co      | K      | 4.13                | 0.82             | 11.18             | 1.80           | 0.34          |

**Table 3. Analysis of spectrum from Area #1 in (e).**

| Z  | Element | Family | Atomic Fraction (%) | Atomic Error (%) | Mass Fraction (%) | Mass Error (%) | Fit error (%) |
|----|---------|--------|---------------------|------------------|-------------------|----------------|---------------|
| 8  | O       | K      | 61.72               | 8.61             | 30.67             | 2.83           | 0.74          |
| 13 | Al      | K      | 0.76                | 0.20             | 0.64              | 0.16           | 10.84         |
| 27 | Co      | K      | 37.52               | 7.24             | 68.69             | 11.14          | 0.89          |

**Table 4. Analysis of spectrum from Area #1 in (f).**

| Z  | Element | Family | Atomic Fraction (%) | Atomic Error (%) | Mass Fraction (%) | Mass Error (%) | Fit error (%) |
|----|---------|--------|---------------------|------------------|-------------------|----------------|---------------|
| 8  | O       | K      | 58.64               | 6.91             | 37.29             | 2.73           | 0.68          |
| 13 | Al      | K      | 26.91               | 6.19             | 28.86             | 6.08           | 1.15          |
| 27 | Co      | K      | 14.45               | 2.57             | 33.85             | 5.14           | 0.24          |

**Figure S4.** (a,d) HAADF-STEM and related (b,c,e,f) EDX-STEM Co and Al elemental mapping images of different areas of CoAl-0.25-R, confirming significant differentiation in its morphology, namely the presence of separate phase close in composition to  $\text{CoAl}_2\text{O}_4$  (Tables 1 and 4),  $\text{Al}_2\text{O}_3$  (Table 2) and cobalt oxides  $\text{CoO}_x$  (Table 3).

**Table S2.** High resolution XPS spectra of Al 2p and O 1s of the samples.

| Catalyst    | XPS spectra of Al 2p                                                                | XPS spectra of O 1s                                                                  |
|-------------|-------------------------------------------------------------------------------------|--------------------------------------------------------------------------------------|
| CoAl-0.5    | 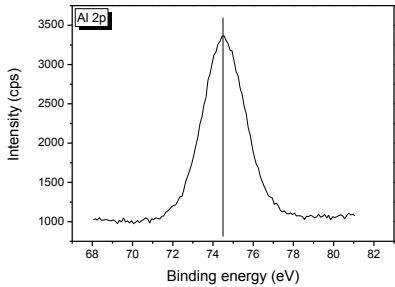   |    |
| CoAl-0.25   |    |    |
| CoAl-0.25-R |   |   |
| CoAl-0.1    |  |  |
| CoAl-0.1-R  |  |  |

CoAl-0.05

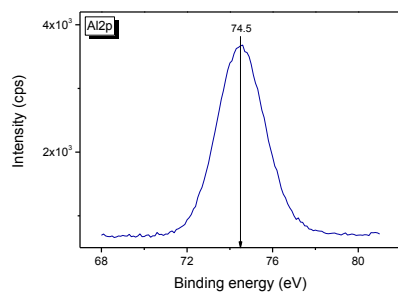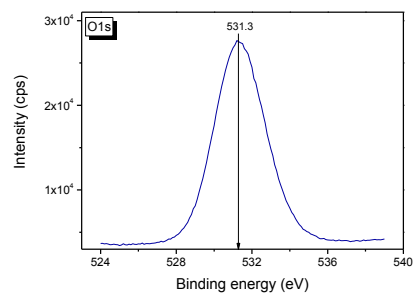

Co/Al<sub>2</sub>O<sub>3</sub>

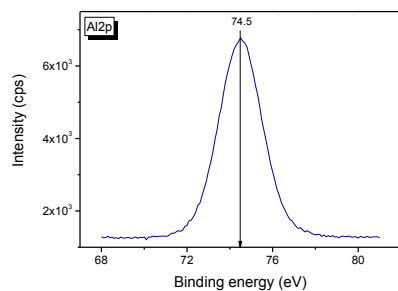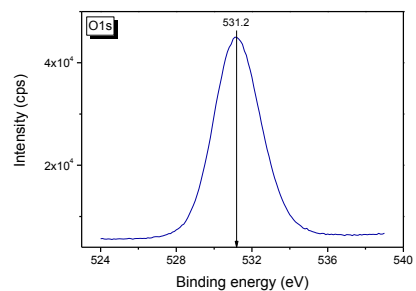

**Table S3.** The N<sub>2</sub> adsorption/desorption isotherms and the pore size distribution of the samples.

| Catalyst  | N <sub>2</sub> adsorption/desorption isotherms                                      | Pore size distribution                                                                                                                                                                                                                                    |
|-----------|-------------------------------------------------------------------------------------|-----------------------------------------------------------------------------------------------------------------------------------------------------------------------------------------------------------------------------------------------------------|
| CoAl-0.5  | 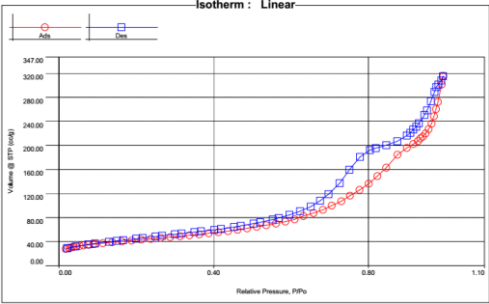   |    |
| CoAl-0.25 |  |                                                                                   |

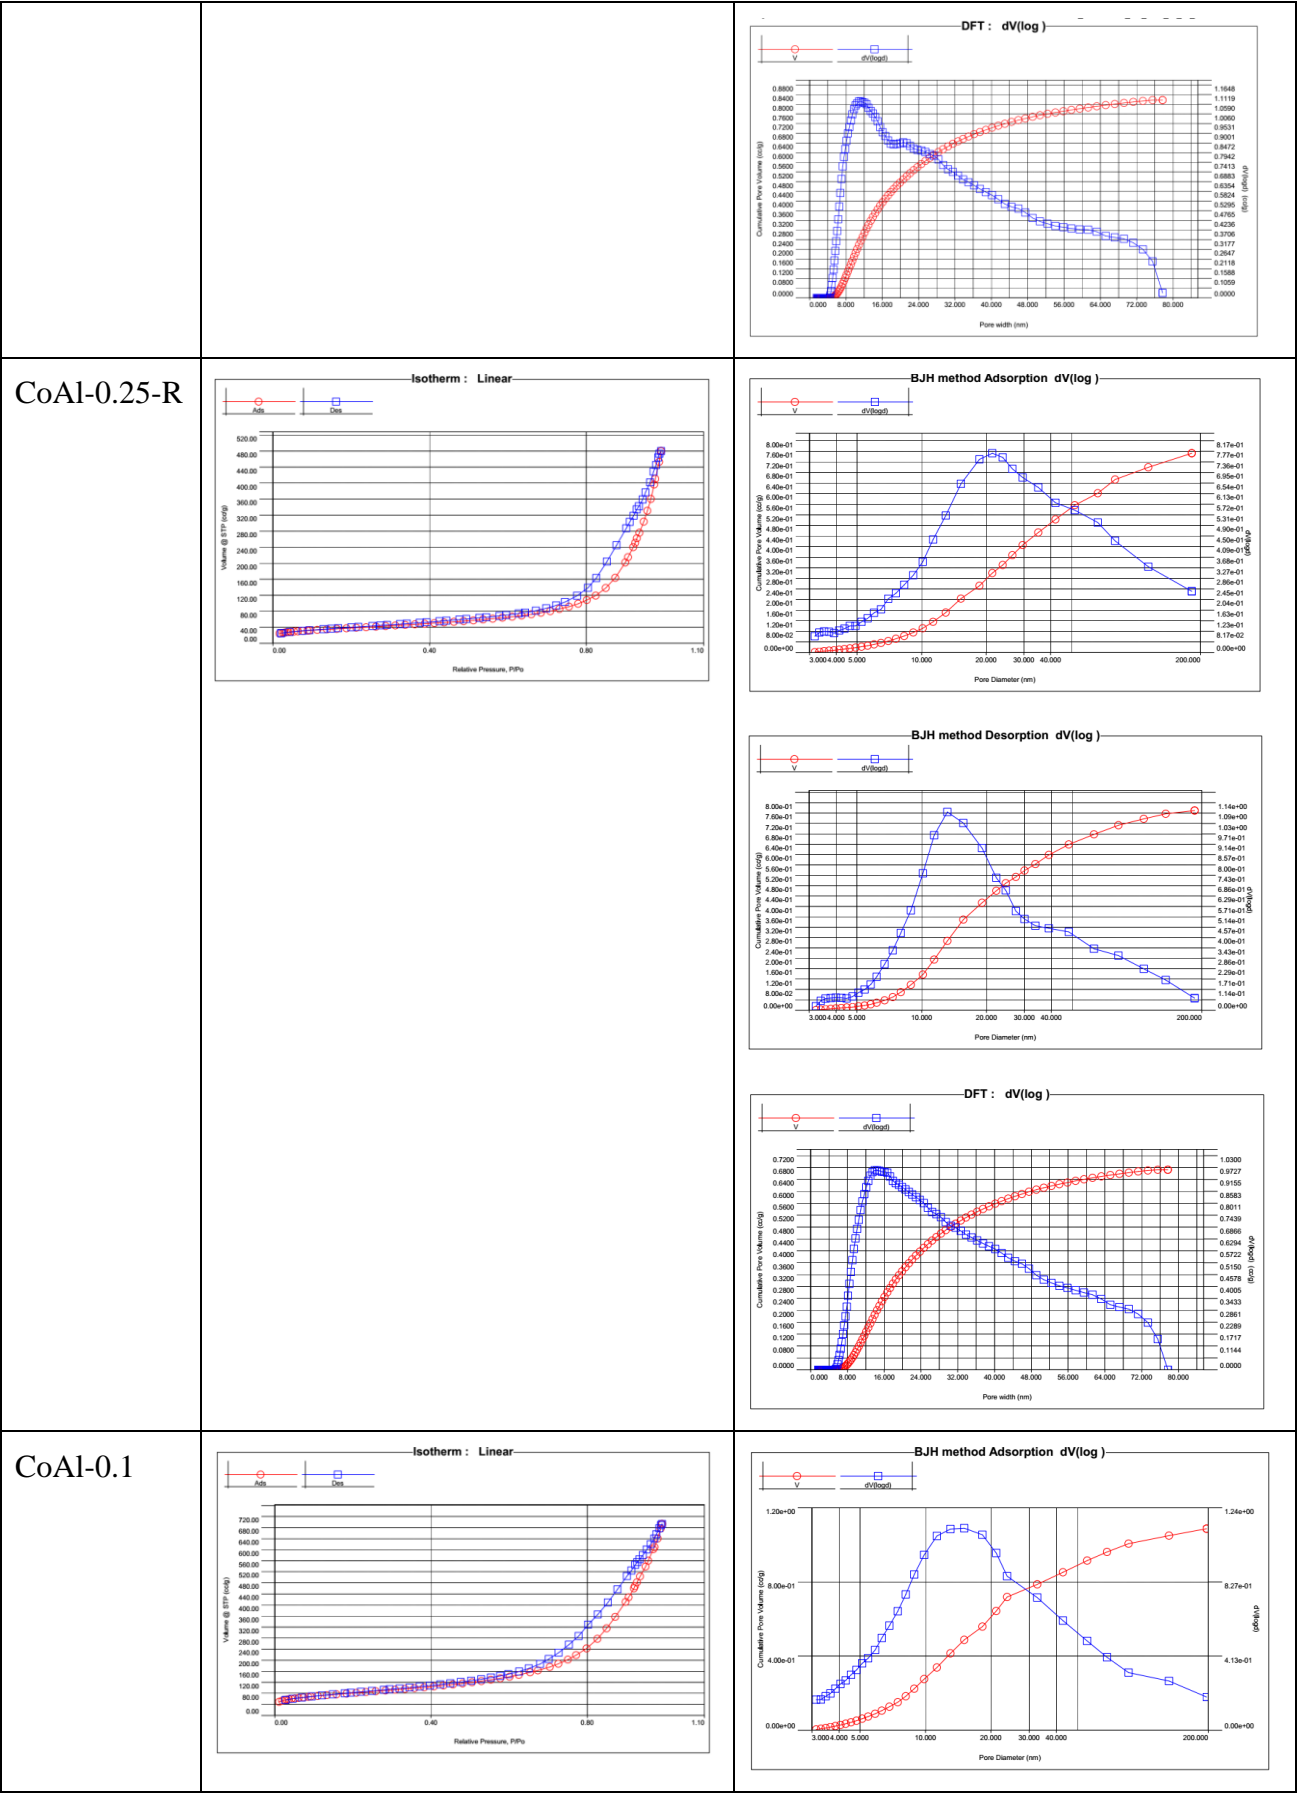



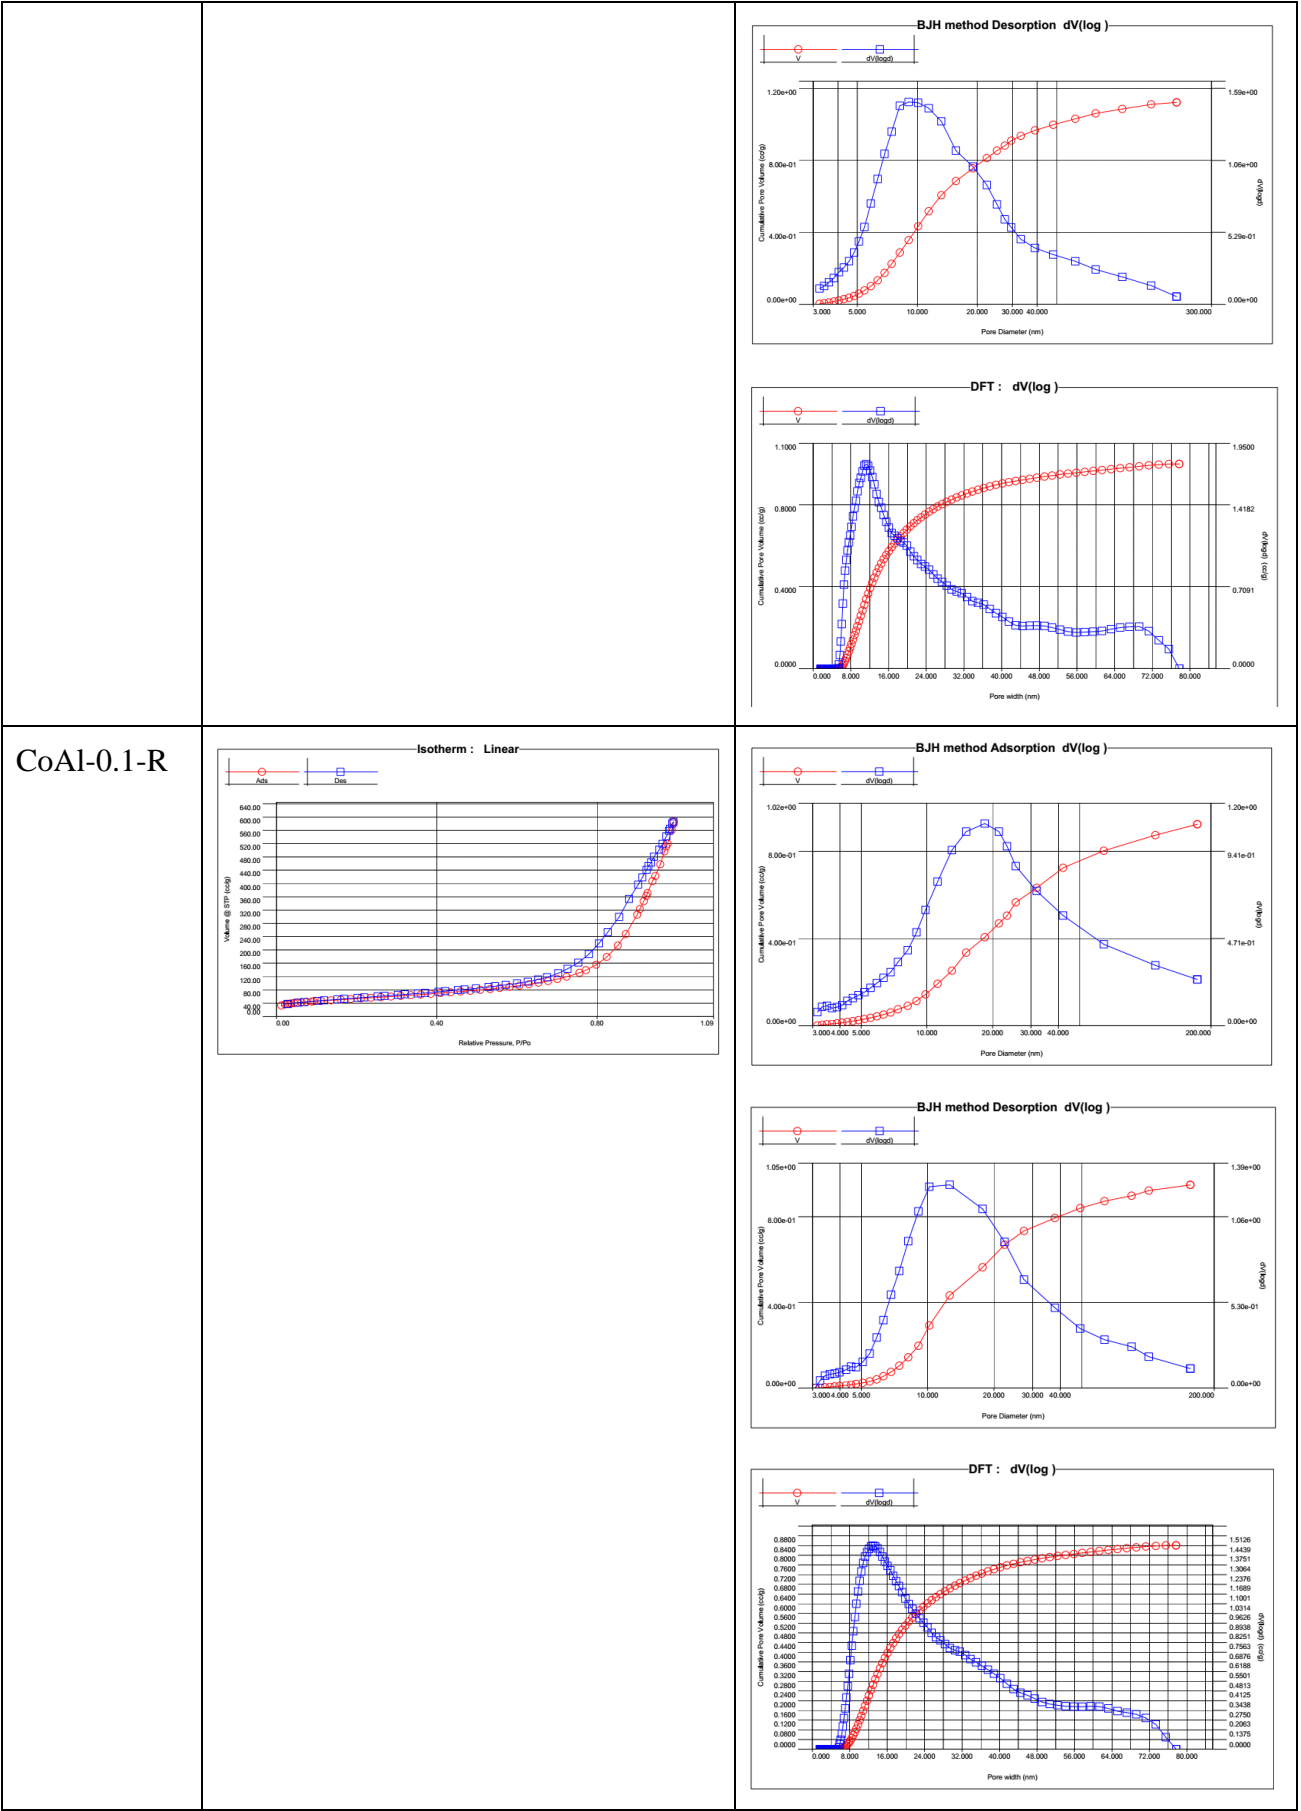

CoAl-0.05

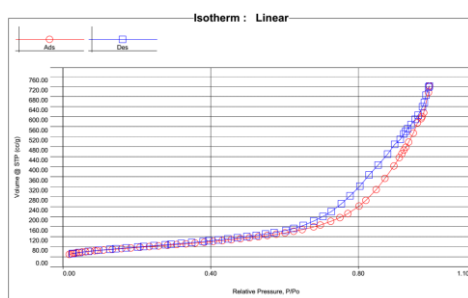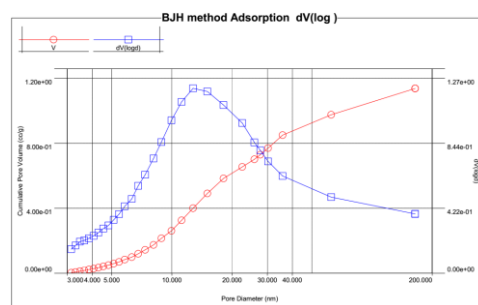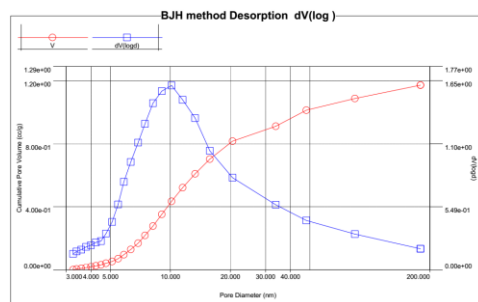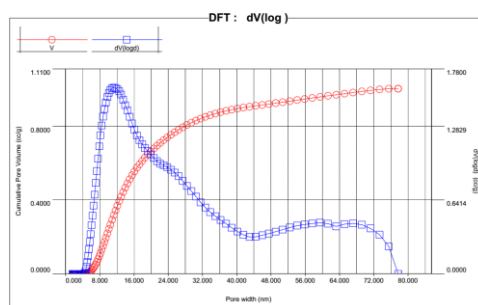

Co/Al<sub>2</sub>O<sub>3</sub>

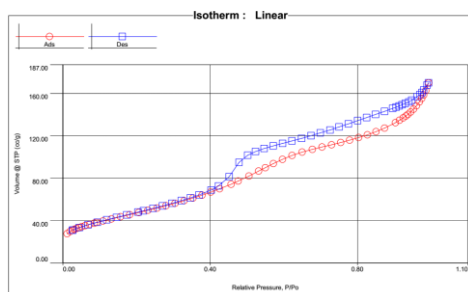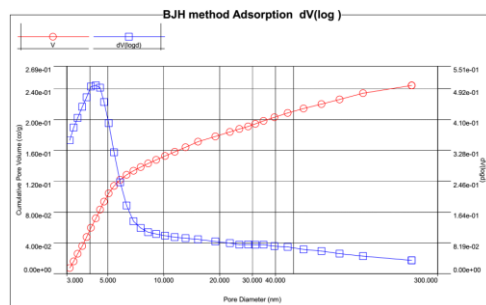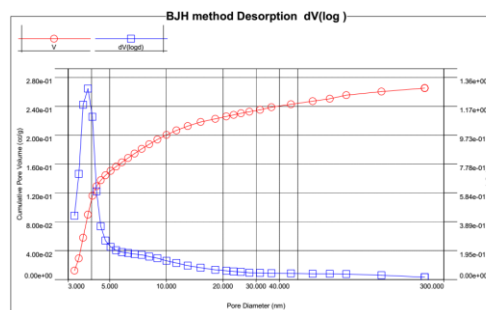

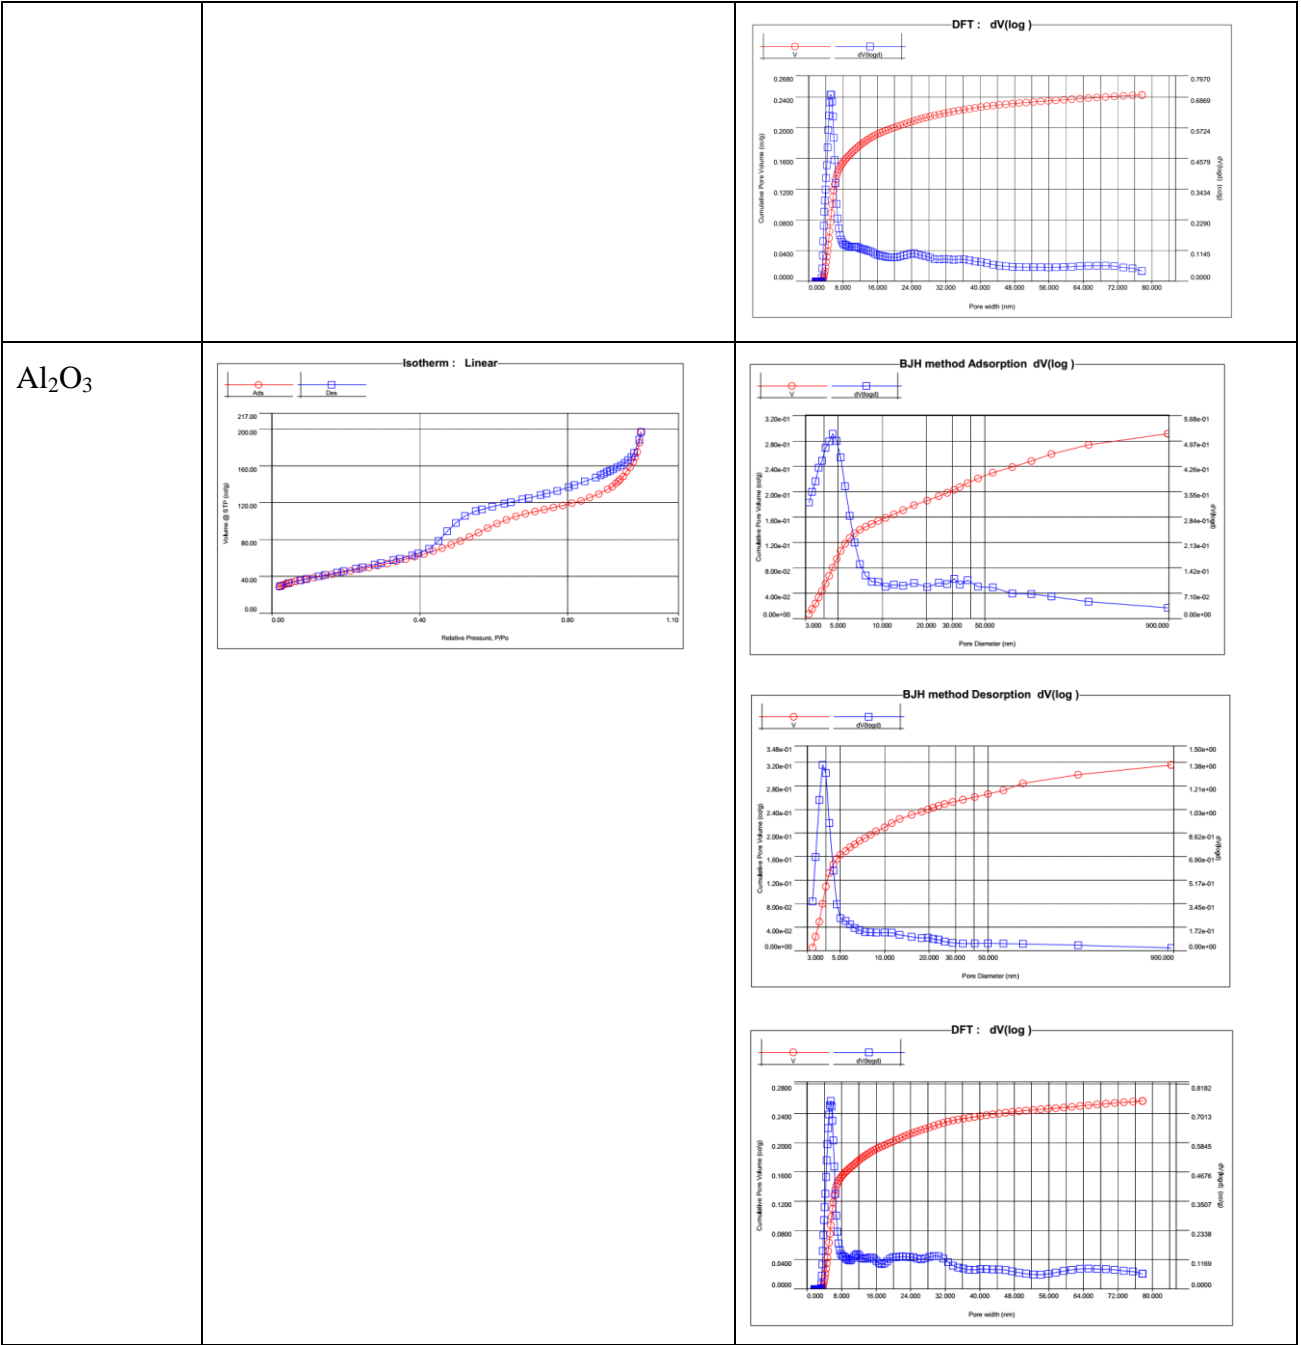

Supplement: s1 [file s1]
